# Supplementary material for: HER3 and LINC00052 interplay promotes tumor growth in breast cancer
Source: PubMed Central journal article supplement (PMC5351650; doi:10.18632/oncotarget.14313), 2016-12-27
Supplement: oncotarget-08-6526-s001.pdf [file oncotarget-08-6526-s001.pdf]

# HER3 and *LINC00052* interplay promotes tumor growth in breast cancer

## Supplementary Materials

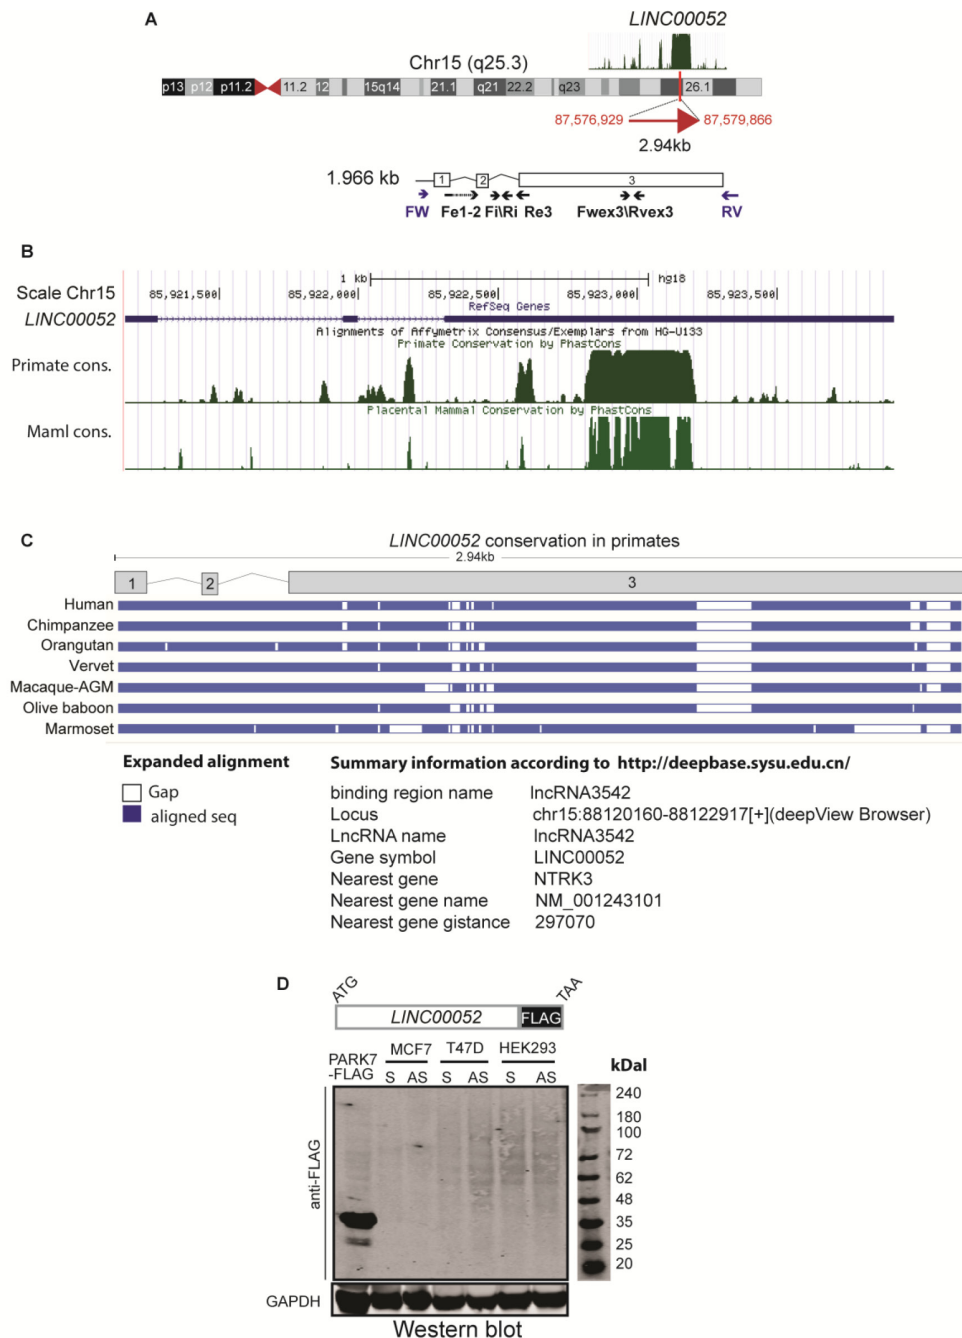

**Supplementary Figure S1: Genomic analysis and expression of *LINC00052*.** (A) Chr15 (q25.3) mapping of *LINC00052* genomic location and its corresponding expected transcriptional unit. The expected pre-mRNA of 2940 bp is marked by the red arrow. Arrows show location of primers used for RT-PCR, qRT-PCR and PCR analysis (FW, RV, Fe-1-2, Re3, Fi/Ri, Fwex3, Rvex3, nucleotide sequences are reported in Supplementary Table S1). (B, C) Schematic of *LINC00052* conservation across the mammals (B) and primates (C). Genome comparative analysis showed that *LINC00052* 3'-end is highly conserved among mammals and high homology was found in primate species-conserved tracks according to: <http://deepbase.sysu.edu.cn/>. (D) Western blot analysis of potential protein expression of *LINC00052*. cDNA of *LINC00052*-sense (S) and *LINC00052*-antisense (AS) were cloned in frame with FLAG-tag inserted before the predicted stop codon. Resulting constructs were transfected in MCF7, T47D, or 293FT cells. Of note, no trace of *LINC00052* protein product was detected after immunoblotting with antibody against FLAG-tag. Recombinant PARK7 bearing FLAG-tag was used as positive control.

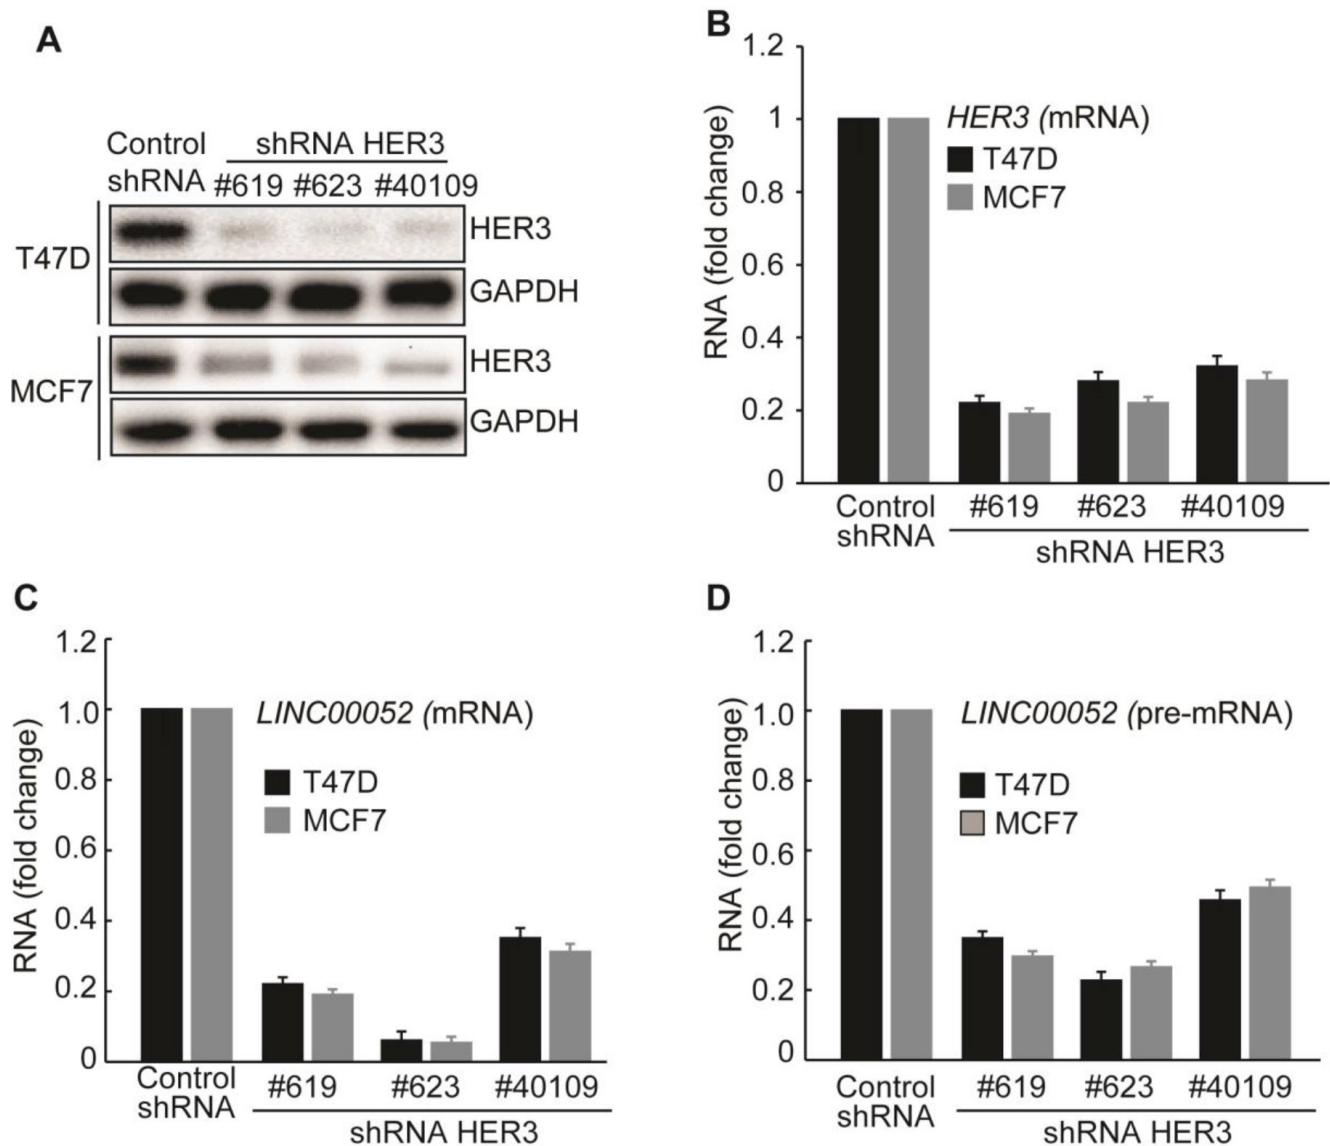

**Supplementary Figure S2: HER3-silencing decreases *LINC00052* expression in breast cancer cells.** (A–D) Breast cancer MCF7 or T47D cells stably expressing three independent HER3-shRNA or control constructs. Western blot analysis for HER3 and GAPDH (A) and evaluation of HER3 mRNA by qPCR (B). Quantitative evaluation of *LINC00052* mRNA (C) and precursor pre-mRNA (D) levels in breast cancer MCF7 or T47D cells stably expressing three independent HER3-shRNA or control constructs.

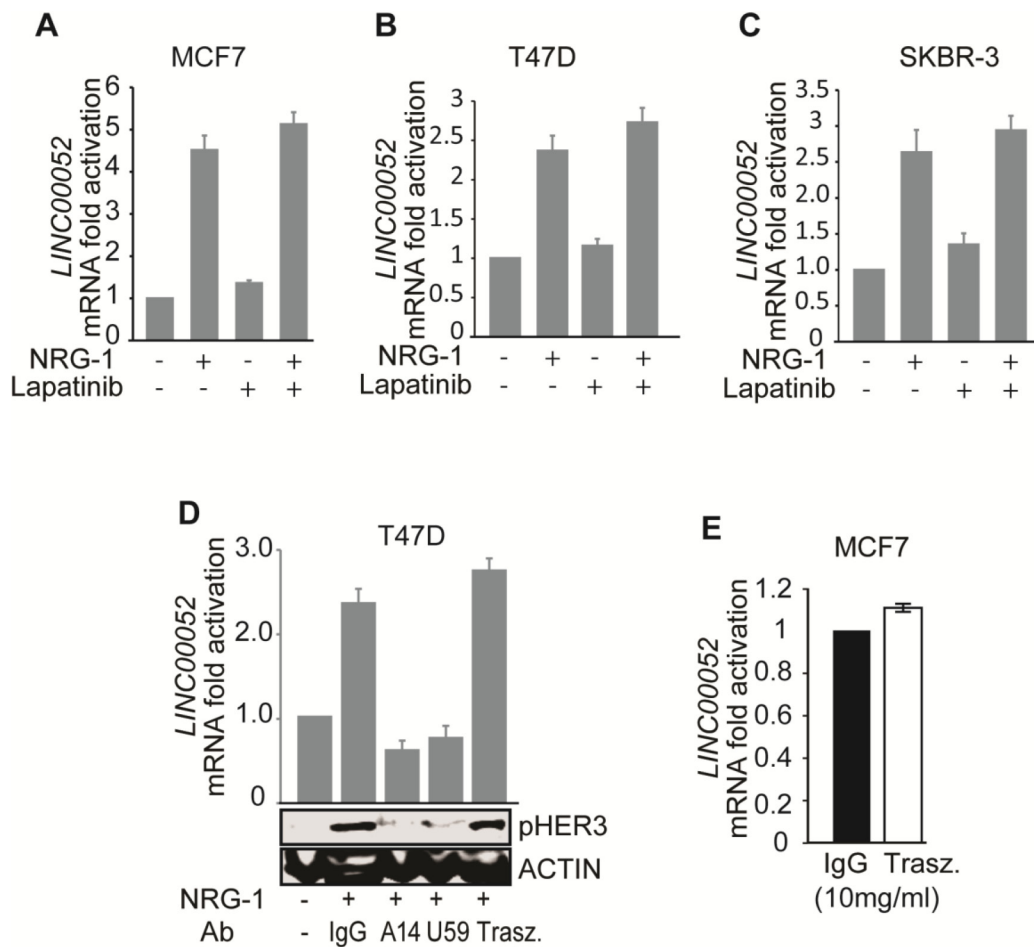

**Supplementary Figure S3: Effects of lapatinib or trastuzumab on *LINC00052* expression.** (A–C) Evaluation of *LINC00052* in breast cancer MCF7, T47D and SKBR-3 cells (grown in 10% FBS) treated with 100 nM of lapatinib or vehicle for 30 min followed by NRG-1-stimulation for 60 min. (D) *LINC00052* levels analyzed by qRT-PCR in T47D breast cancer cells treated with HER3 (referred as A14 and U59) and HER2 (Trasz) blocking antibodies. T47D cells were grown in 10% fetal serum bovine to reach 85% confluence followed by 18 hrs serum-starvation. Subsequently, cells were pre-treated for 30 min with 10 µg/ml B14 or U59 (HER3 neutralizing monoclonal antibodies) or *trastuzumab* (HER2 blocking antibody), followed by 60 min stimulation with 100 ng/ml of NRG-1 (+) or untreated (–), as indicated. *LINC00052* and HER3 RNA relative expression were analyzed by qRT-PCR and whole cell lysates were analyzed by Western blot with antibodies against pHER3 and ACTIN. Of note, blocking monoclonal antibodies against HER3 but not against HER2 inhibit *LINC00052* RNA expression upon NRG-1-stimulation. (E) Evaluation of *LINC00052* by qRT-PCR in MCF7 breast cancer cells treated with trastuzumab. Cells were grown in 10% fetal serum bovine to reach 85% confluence followed by 18 hrs serum-starvation. Subsequently, cells were pre-treated for 30 min with 10 µg/ml trastuzumab or IgG-isotype (control).

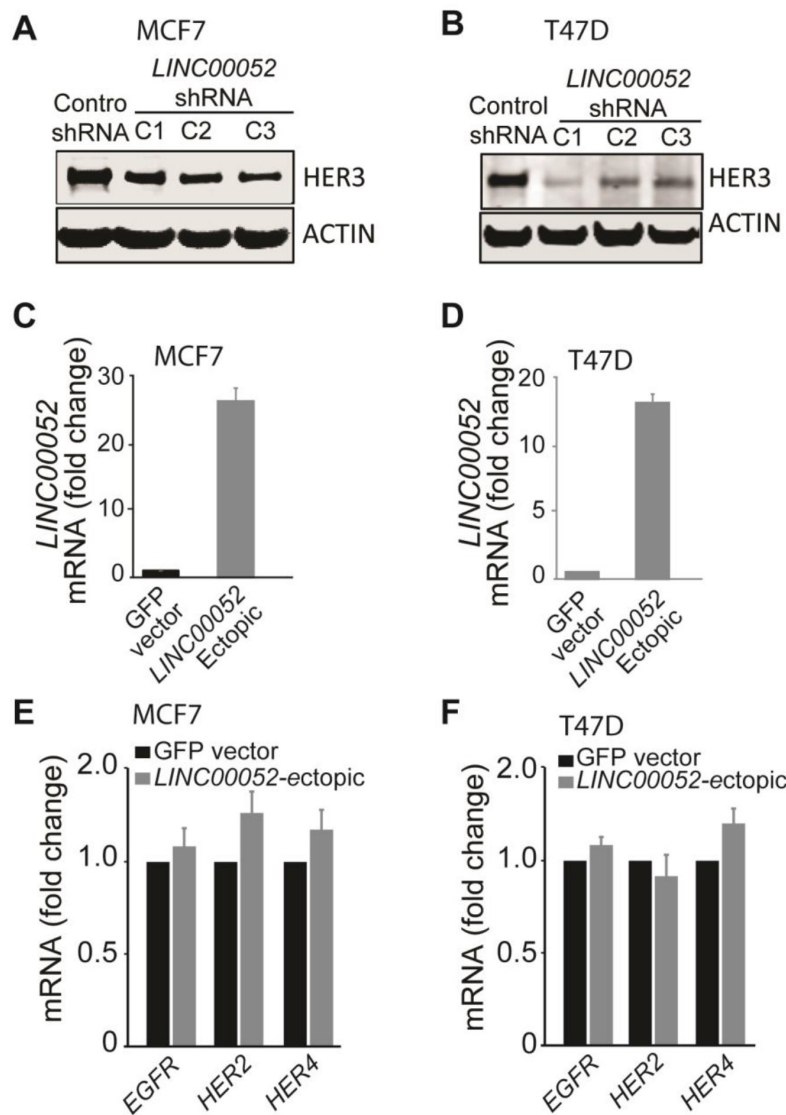

**Supplementary Figure S4: Regulation of HER3 expression by *LINC00052*.** (A, B) Breast cancer cells MCF7 or T47D stably expressing three different lentiviral *LINC00052*-silenced shRNA, and control-shRNA constructs were grown in 10% fetal serum bovine to reach 85% confluence and subsequently evaluated for HER3 expression by Western blot. (C, D) Evaluation of *LINC00052* RNA expression in breast cancer cells MCF7 or T47D stably expressing ectopic *LINC00052* or control constructs (E, F) Evaluation of *EGFR*, *HER2*, and *HER4* RNA levels (normalized to GAPDH) by qRT-PCR.

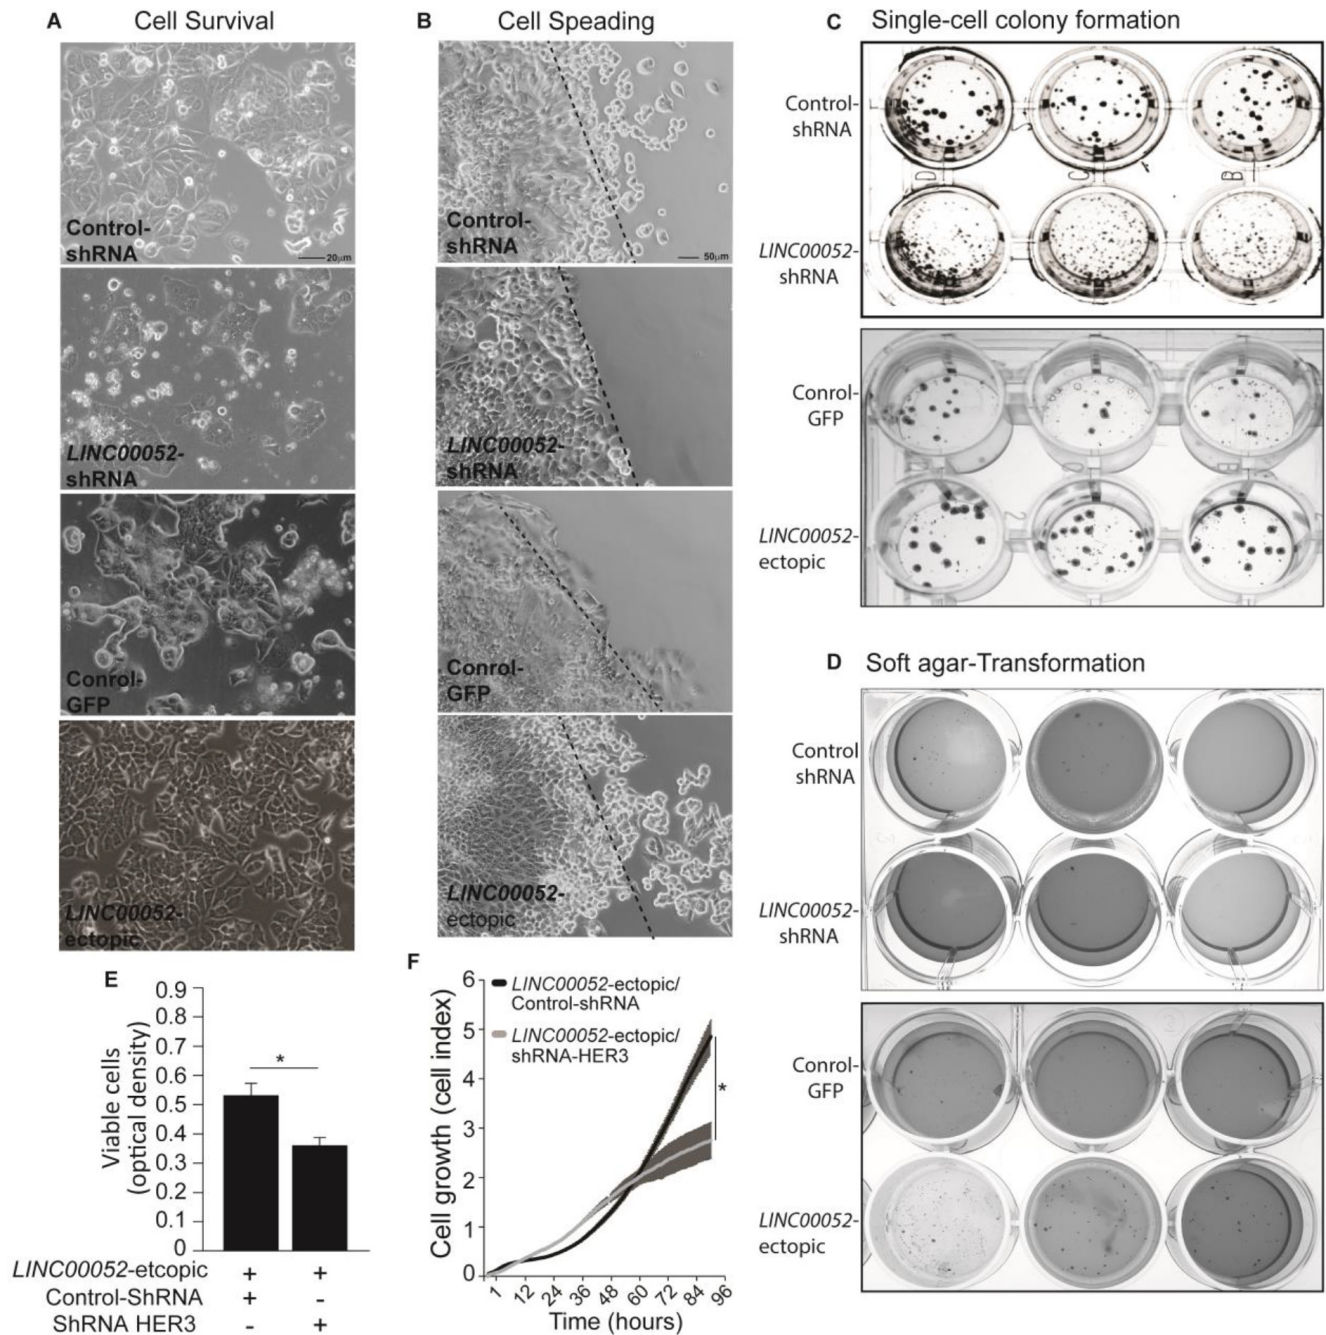

**Supplementary Figure S5: *LINC00052* effects in breast cancer cells.** (A–D) MCF7 breast cancer cells stably expressing *LINC00052*-shRNA, *LINC00052*-ectopic or control lentiviral constructs were subjected to functional assays. (A) MCF7 cells were seeded at 50% confluence in complete medium and grown for 72 hrs, representative cell images are shown prior to the cell viability assay. (B) *Spheroids*-spreading, representative images from *spheroids* fixed 24 h after of *spreading* onto *plastic* surface of transduced MCF7 cells (as indicated). Evaluation of spreading activity as number of migrated cells out of the spheroid “borders” (arbitrary black line), counts are reported as % of spreading of control cells. (C) Single-cell colony formation, transduced MCF7 cells (as indicated) were plated in 12-well plates at extremely low density (10 cells/cm<sup>2</sup>) and grown in RPMI medium supplemented with 10% FBS for 4 weeks. (D) Transformation activity, transduced MCF7 cells were cultured in 0.35% soft agar in RPMI medium supplemented with 10% FBS. Cells were assessed for anchorage-independent growth for 4 weeks. Representative images of colony formation are reported. (E, F) Evaluation of cell survival and growth of MCF7, *LINC00052*-ectopic cells transduced with *HER3*-shRNA or control-shRNA constructs.

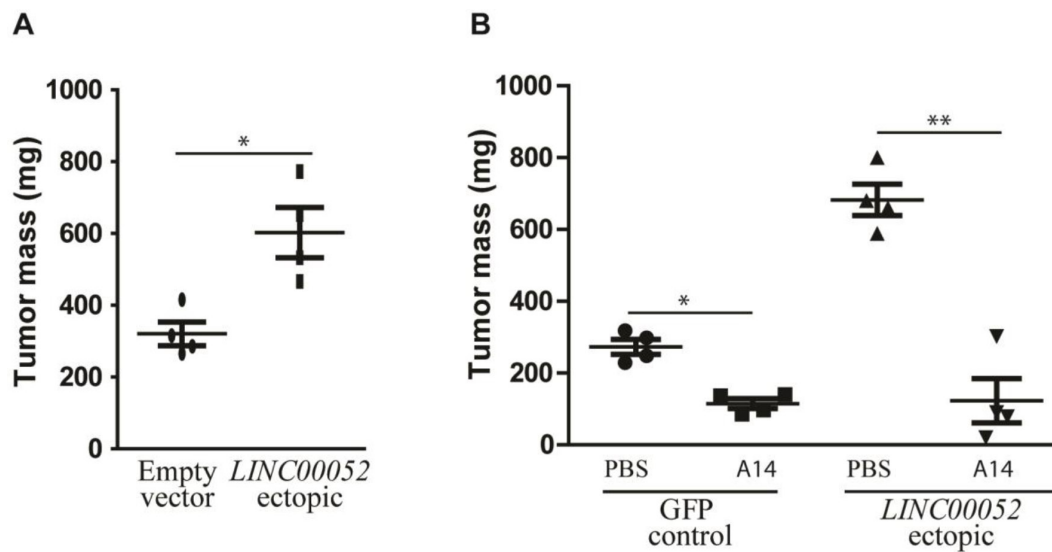

**Supplementary Figure S6: Functions of *LINC00052* in MCF7 breast tumor xenograft models.** (A) Female immunodeficient nude mice received subcutaneous (SC) injection of  $5 \times 10^6$  MCF7 cells stably expressing *LINC00052* ectopic or scramble control constructs. Experiment end-point tumor mass (mg, milligram) of 6-week tumors are shown. (B) *In vivo* HER3 antibody treatment of nude mice bearing MCF7 xenografts of cells stably expressing *LINC00052*-ectopic or control GFP constructs. Two cohorts of SCID mice with size-matched tumors ( $n = 6$ /group) received 10  $\mu\text{g/g}$  per dose of HER3 blocking antibody or negative control-PBS. Treated mice received a series of doses ( $n = 9$ ) through intraperitoneal (i.p.) administration twice weekly. Experimental end-point 6-week tumors mass (mg, milligram) are shown. Mean  $\pm$  SD is shown. \* $p < 0.05$ , \*\* $p < 0.01$ .

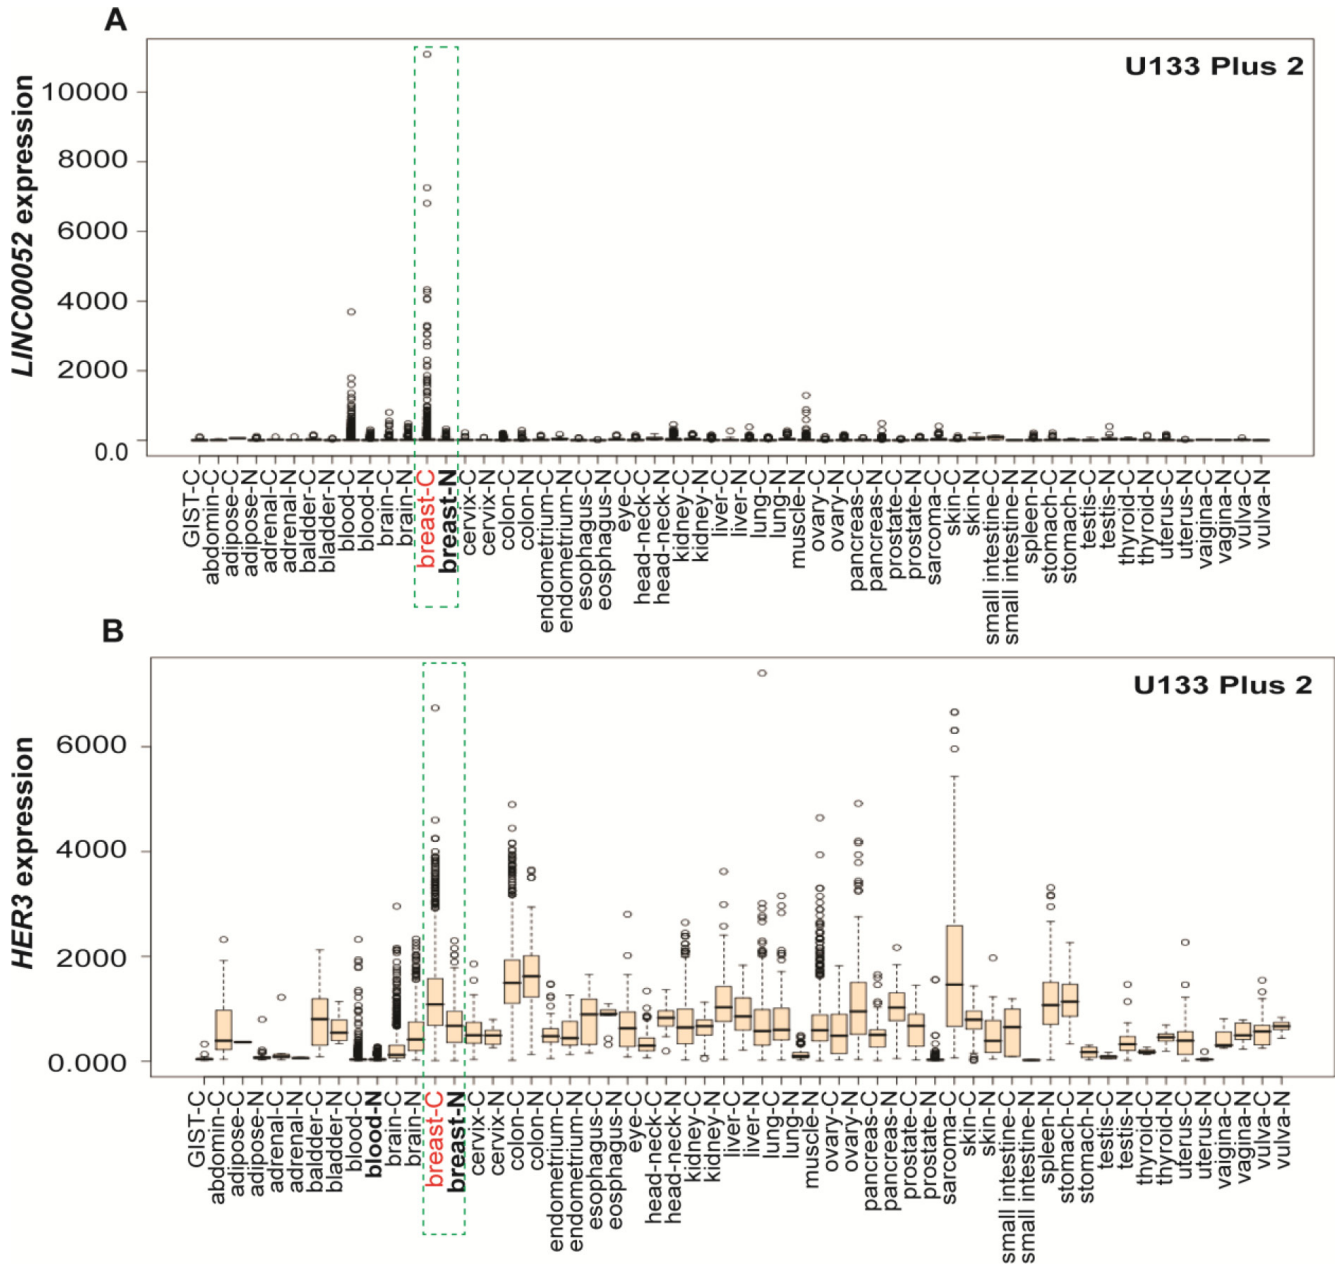

**Supplementary Figure S7: (A, B) *In silico* analysis of *LINC00052* and *HER3* expression. Gene Expression across Normal and Tumor tissue (Gent), <http://medicalgenome.kribb.re.kr/GENT/>. The database contains a large sample subset data are generated from malignant (indicated as “C”) and nonmalignant tissues (indicated as “N”).**

**Supplementary Table S1: Oligonucleotides used in the study**

| <b>Primer Name</b>           | <b>Sequence (5'-3')</b>                                                               |
|------------------------------|---------------------------------------------------------------------------------------|
| <i>LINC0052</i> cloning      |                                                                                       |
| RV cloning <i>LINC52</i>     | CGGTGGATCCGAATTGGCCTTGTATAATAACTGGTTTATTTCACTTAACACAACG                               |
| RV cloning-FLAG PLVX         | CGGTGGATCCGAATTTCACTTGTATCGTCGTCCTTGTAGTCTGATCCGCCACCTCCACC<br>GGTAGCTGGTCTTGGGGAAGGT |
| FW cloning <i>LINC52</i>     | GGTCGCCACCGAATTACTCAGCTCTCTCACCATGCGATTGCCCTGCAACACC                                  |
| RV cloning <i>LINC52</i> +U3 | CTAGATCCGGTGGATCCAGTTATGGAACAAGAGA                                                    |
| RV cloning <i>LINC52</i>     | CGGTGGATCCGAATTGGCCTTGTATAATAACTGGTTTATTTCACTTAACACAACG                               |
| FW <i>LINC52_AS_PLVX</i>     | GGTCGCCACCGAATTGGCCTTGTATAATAACTGGTTTATTTCACTTAACACAACG                               |
| RV <i>LINC52_AS_PLVX</i>     | CGGTGGATCCGAATTACTCAGCTCTCTCACCATGCGATTGCCCTGCAACACC                                  |
| qRT-PCR                      |                                                                                       |
| ACTIN FW                     | CTCTTCAGCCTTCCTTCCT                                                                   |
| ACTIN RV                     | AGCACTGTGTTGGCGTACAG                                                                  |
| FW GAPDH                     | TTGCCATCAATGACCCCTTCA                                                                 |
| RV GAPDH                     | CGCCCCACTTGATTTTGGGA                                                                  |
| FW1 18S rRNA                 | GGCCCTGTAATTGGAATGAGTC                                                                |
| RV1 18S rRNA                 | CCAAGATCCAACACTACGAGCTT                                                               |
| FW2 18S rRNA                 | GTAACCCGTTGAACCCATT                                                                   |
| RV2 18S rRNA                 | CCATCCAATCGGTAGTAGCG                                                                  |
| <i>LINC00052</i> Fi          | GGGAAGATCAGCAAAGCAAAC                                                                 |
| <i>LINC00052</i> Ri          | AAGATTTTATTGCCCTAA                                                                    |
| <i>LINC00052</i> Fex3        | ATCATAACAATTATCCTG                                                                    |
| <i>LINC00052</i> Rex3        | CGTCACCACAATCAATTT                                                                    |
| <i>LINC00052</i> Rex3.1      | AAGATTTTATTGCCCTAA                                                                    |
| hEGFR FW1                    | GGCACTTTTGAAGATCATTTTCTC                                                              |
| hEGFR RV1                    | CTGTGTTGAGGGCAATGAG                                                                   |
| hEGFR FW2                    | CGAGGGCAAATACAGCTT                                                                    |
| hEGFR RV2                    | AAATTCACCAATACCTATT                                                                   |
| HER3/neu FW1                 | CCTCTGACGTCCATCGTCTC                                                                  |
| HER3/neu RV1                 | CGGATCTTCTGCTGCCGTCG                                                                  |
| HER3/neu FW2                 | CTGAACTGGTGTATGCAGATTGC                                                               |
| HER3/neu RV2                 | TTCCGAGCGGCAAGTC                                                                      |
| HER2_FW3                     | GGTCCTGGAAGCCACAAGG                                                                   |
| HER2_RV3                     | GGTTTTCCCACCACATCCTCT                                                                 |
| HER3 F1                      | TGCAGTGGATTGAGAAAGTG                                                                  |
| HER3 R1                      | GGCAAACCTCCCATCGTAGA                                                                  |
| HER4 FW                      | ACAGCAGTACCGAGCCTTTGC                                                                 |
| HER4 RV                      | GCCACTACCACGTAGCCTGTGAC                                                               |
| <b>FISH-RNA</b>              |                                                                                       |
| <i>LINC52</i> Rv ex3+T7      | TAATACGACTCACTATAGGGAGAGATGTAGCAAAGCATCACAA                                           |
| <i>LINC52</i> Rv ex3+T3      | AATTAACCCTCACTAAAGGGAGAGATGTAGCAAAGCATCACAA                                           |
